# Supplementary material for: A Genome-Wide Analysis of Pathogenesis-Related Protein-1 (PR-1) Genes from Piper nigrum Reveals Its Critical Role during Phytophthora capsici Infection
Source: MDPI journal article supplement (doi:10.3390/genes12071007), 2021-06-30
Supplement: s1 [file s1]

# A Genome-Wide Analysis of Pathogenesis-Related Protein-1 (PR-1) Genes from *Piper nigrum* Reveals Its Critical Role During *Phytophthora capsici* Infection

Divya Kattupalli †, Srinivasan Asha † and Eppurathu Vasudevan Soniya \*

## Supplementary Figures

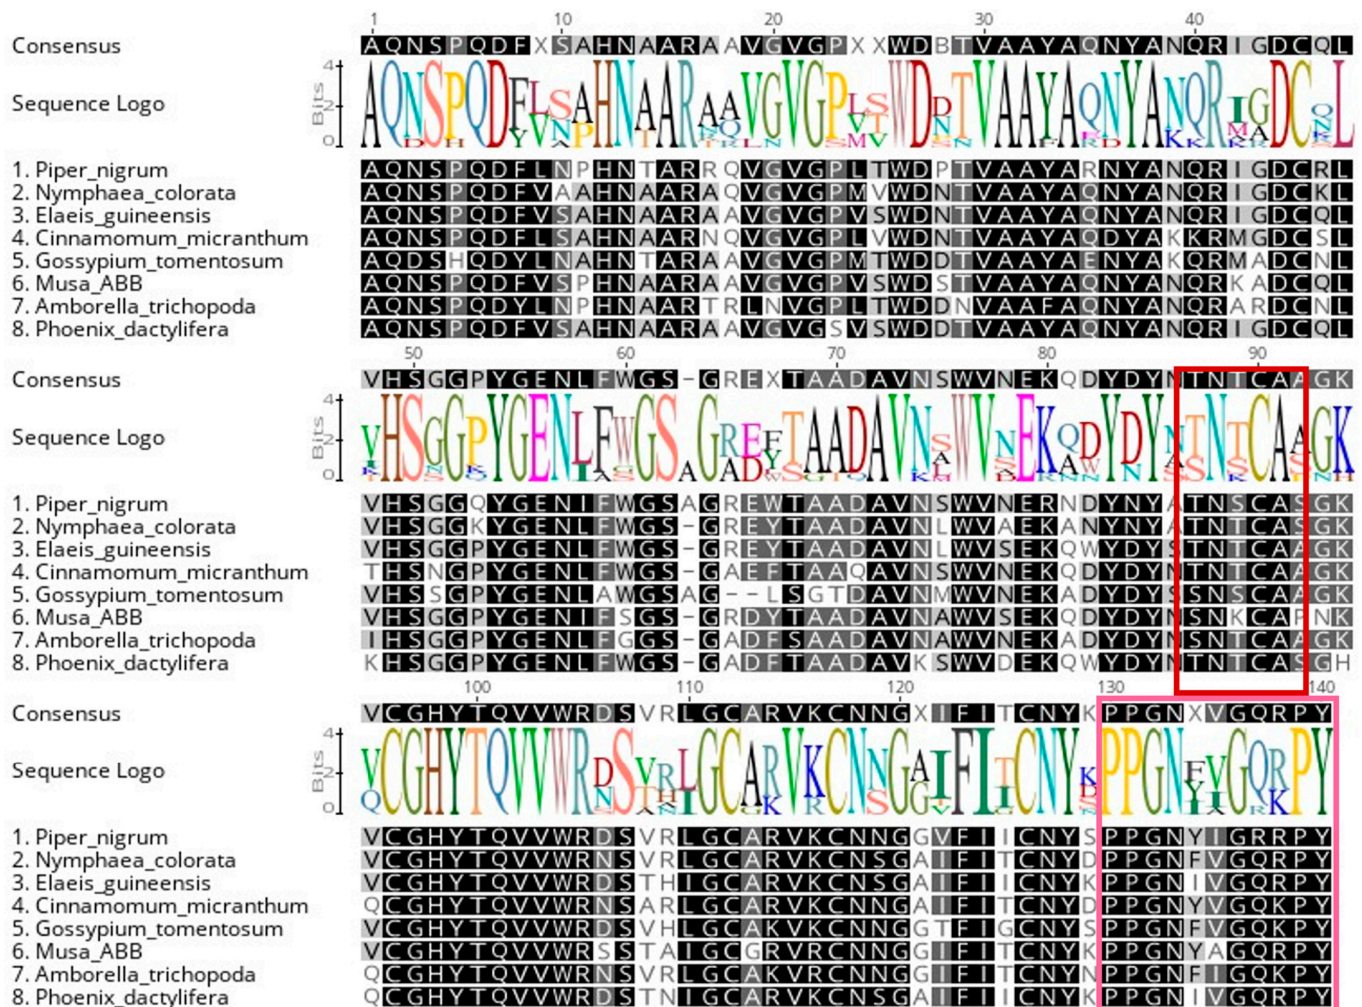

**Supplementary Figure S1.** The amino acid sequences from *Piper nigrum*, *Nymphaea colorata*, *Elaeis guineensis*, *Cinnamomum micranthum*, *Gossypium tomentosum*, *Musa ABB*, *Amborella trichopoda* and *Phoenix dactylifera* were aligned using Geneious bioinformatics software (<https://www.geneious.com/> Accessed on January 28<sup>th</sup> 2021) with default settings. The conserved domains are highlighted in different colors. The CAP domain

structure with a caveolin-binding motif (CBM) and a CAP-derived peptide (CAPE) are shown in red and pink boxes.

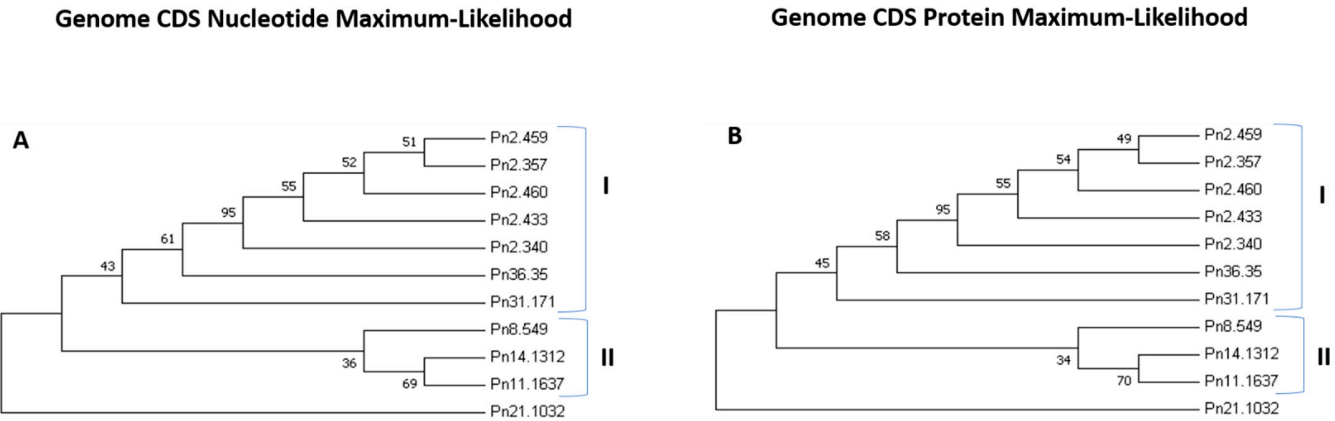

**Supplementary Figure S2. (A, B)** Phylogenetic analyses of *Piper nigrum* PR-1 nucleotide and protein sequences. The phylogenetic tree was constructed using MEGA 7.0. by the maximum-likelihood (ML) method with 1000 bootstrap replicates and default parameters. The *PnPR-1* family genes were divided into two major groups, groups I and II.

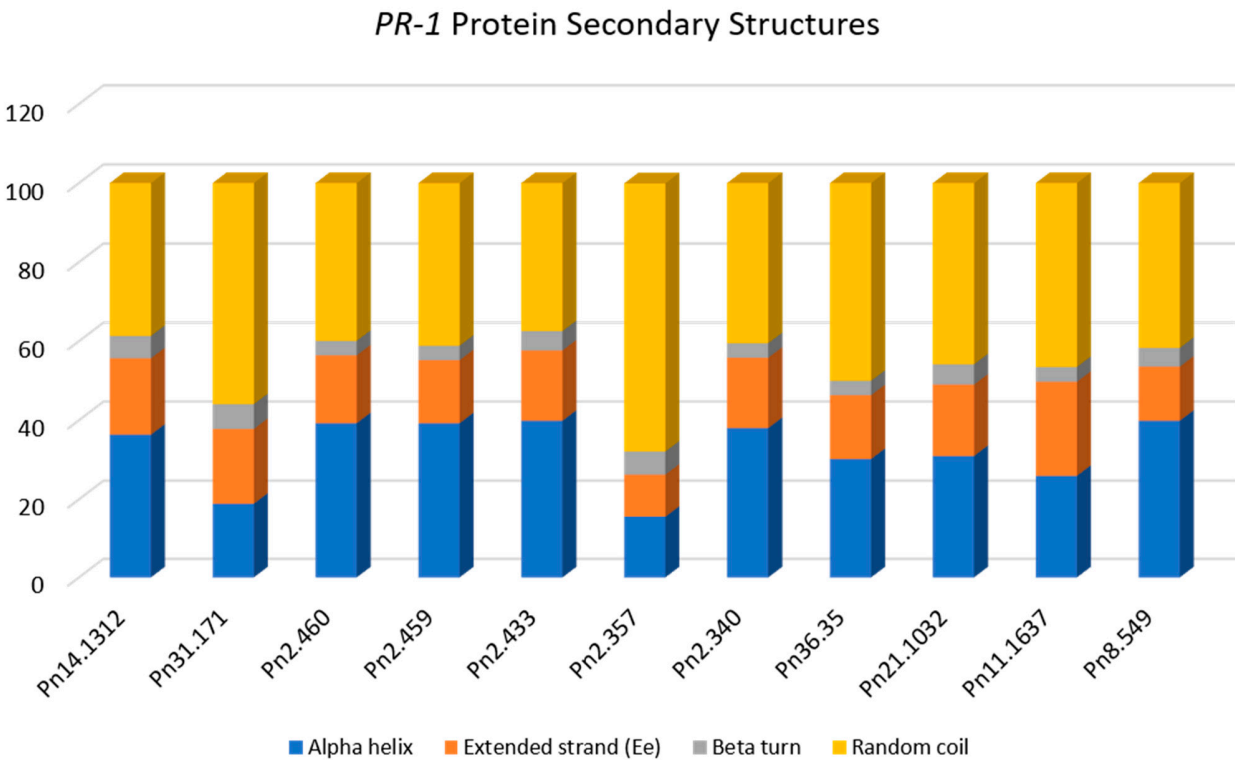

**Supplementary Figure S3.** Secondary structure analyses of *PnPR-1* proteins.

| Factor or Site Name | Sequences   | Pn2.460 | Pn2.433 | Pn2.459 | Pn8.549 | Pn2.340 | Pn2.357 | Pn14.1312 | Pn36.35 | Pn21.1032 | Pn11.1637 | Pn31.171 |
|---------------------|-------------|---------|---------|---------|---------|---------|---------|-----------|---------|-----------|-----------|----------|
| DOFCOREZM           | AAAG        |         |         |         |         |         |         |           |         |           |           |          |
| NODCON1GM           | AAAGAT      |         |         |         |         |         |         |           |         |           |           |          |
| AACACOREOSGLUB1     | AACAAAC     |         |         |         |         |         |         |           |         |           |           |          |
| POLASIG1            | AATAAA      |         |         |         |         |         |         |           |         |           |           |          |
| POLASIG3            | AATAAT      |         |         |         |         |         |         |           |         |           |           |          |
| POLASIG2            | AATTAAA     |         |         |         |         |         |         |           |         |           |           |          |
| ACGTATERD1          | ACGT        |         |         |         |         |         |         |           |         |           |           |          |
| POLLEN1LELAT52      | AGAAA       |         |         |         |         |         |         |           |         |           |           |          |
| BOXIINTPATP8        | ATAGAA      |         |         |         |         |         |         |           |         |           |           |          |
| ROOTMOTIFTAPOX1     | ATATT       |         |         |         |         |         |         |           |         |           |           |          |
| RAV1AAT             | CAACA       |         |         |         |         |         |         |           |         |           |           |          |
| CIACADIANLELHC      | CAANNNNATC  |         |         |         |         |         |         |           |         |           |           |          |
| CAATBOX1            | CAAT        |         |         |         |         |         |         |           |         |           |           |          |
| EBOXBNNAPA          | CANNTG      |         |         |         |         |         |         |           |         |           |           |          |
| CATATGMSAUR         | CATATG      |         |         |         |         |         |         |           |         |           |           |          |
| MYCATERD1           | CATGTG      |         |         |         |         |         |         |           |         |           |           |          |
| CCAATBOX1           | CCAAT       |         |         |         |         |         |         |           |         |           |           |          |
| MYBCORE             | CNGTTR      |         |         |         |         |         |         |           |         |           |           |          |
| NODCON2GM           | CTCTT       |         |         |         |         |         |         |           |         |           |           |          |
| CARGCW8GAT          | CWWWWWWWWWG |         |         |         |         |         |         |           |         |           |           |          |
| GT1GMSCAM4          | GAAAAA      |         |         |         |         |         |         |           |         |           |           |          |
| ECCRCALH1           | GANTTNC     |         |         |         |         |         |         |           |         |           |           |          |
| GATABOX             | GATA        |         |         |         |         |         |         |           |         |           |           |          |
| IBOXCORE            | GATAA       |         |         |         |         |         |         |           |         |           |           |          |
| MYBST1              | GGATA       |         |         |         |         |         |         |           |         |           |           |          |
| GT1CORE             | GGTTAA      |         |         |         |         |         |         |           |         |           |           |          |
| GT1CONSENSUS        | GRWAAW      |         |         |         |         |         |         |           |         |           |           |          |
| CURECORECR          | GTAC        |         |         |         |         |         |         |           |         |           |           |          |
| GTGANTG10           | GTGA        |         |         |         |         |         |         |           |         |           |           |          |
| ARR1AT              | NGATT       |         |         |         |         |         |         |           |         |           |           |          |
| SEF4MOTIFGM7S       | RTTTTTTR    |         |         |         |         |         |         |           |         |           |           |          |
| CBFHV               | RYCGAC      |         |         |         |         |         |         |           |         |           |           |          |
| TAAAGSTKST1         | TAAAG       |         |         |         |         |         |         |           |         |           |           |          |
| MYBGAHV             | TAACAAA     |         |         |         |         |         |         |           |         |           |           |          |
| GAREAT              | TAACAAR     |         |         |         |         |         |         |           |         |           |           |          |
| AMYBOX1             | TAACARA     |         |         |         |         |         |         |           |         |           |           |          |
| HDZIP2ATATHB2       | TAATMATT    |         |         |         |         |         |         |           |         |           |           |          |
| TATABOX2            | TATAAAT     |         |         |         |         |         |         |           |         |           |           |          |
| -10PEHVPSBD         | TATTCT      |         |         |         |         |         |         |           |         |           |           |          |
| WRKY71OS            | TGAC        |         |         |         |         |         |         |           |         |           |           |          |
| ASF1MOTIFCAMV       | TGACG       |         |         |         |         |         |         |           |         |           |           |          |
| WBOXHVIS01          | TGACT       |         |         |         |         |         |         |           |         |           |           |          |
| WBOXNTERF3          | TGACY       |         |         |         |         |         |         |           |         |           |           |          |
| BIHD1OS             | TGTCA       |         |         |         |         |         |         |           |         |           |           |          |
| TGTCACACMCUCUMISIN  | TGTACA      |         |         |         |         |         |         |           |         |           |           |          |
| TATABOX5            | TTATTT      |         |         |         |         |         |         |           |         |           |           |          |
| WBOXATNPR1          | TTGAC       |         |         |         |         |         |         |           |         |           |           |          |
| CGCGBOXAT           | VGCGGB      |         |         |         |         |         |         |           |         |           |           |          |
| CACTFTPPCA1         | YACT        |         |         |         |         |         |         |           |         |           |           |          |
| SEBFCONSSTPR10A     | YTGWC       |         |         |         |         |         |         |           |         |           |           |          |

**Supplementary Figure S4.** Analysis of cis-acting elements in *PnPR-1* promoters using the New PLACE online server. The number of elements in each gene is represented in data bars.
